# Supplementary material for: Transcriptomic analysis highlights epigenetic and transcriptional regulation during zygotic embryo development of Pinus pinaster
Source: PubMed Central journal article supplement (PMC3844413; doi:10.1186/1471-2229-13-123), 2013-08-30

**A**

R/G intensity ratio (M)

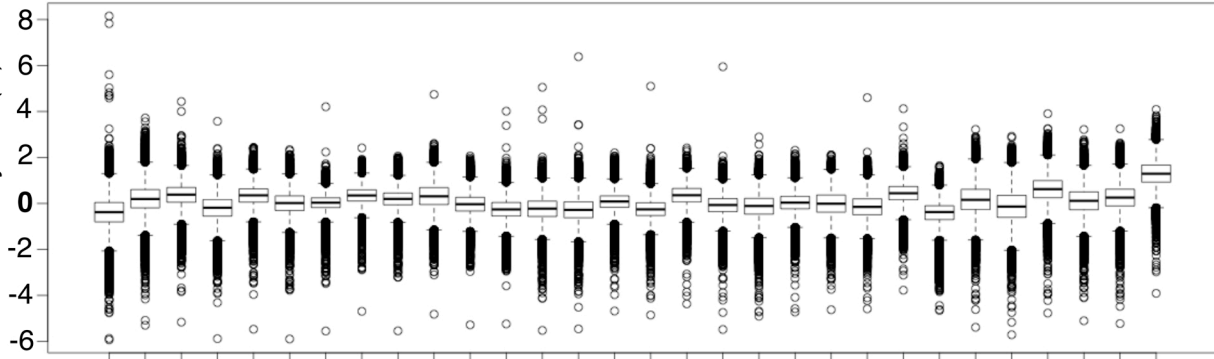**B**

R/G intensity ratio (M)

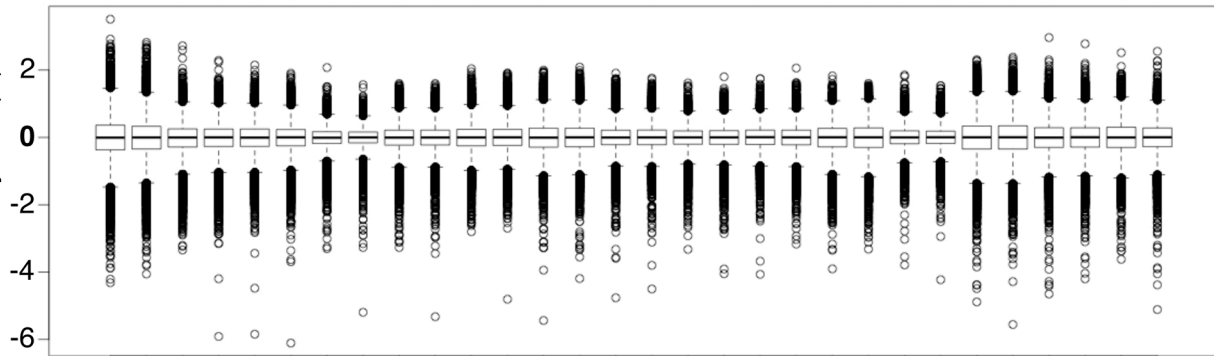

Supplement: 1471-2229-13-123-S1.pdf [file 1471-2229-13-123-S1.pdf]
