# Supplementary material for: Transcriptomic analysis highlights epigenetic and transcriptional regulation during zygotic embryo development of Pinus pinaster
Source: PubMed Central journal article supplement (PMC3844413; doi:10.1186/1471-2229-13-123), 2013-08-30

A

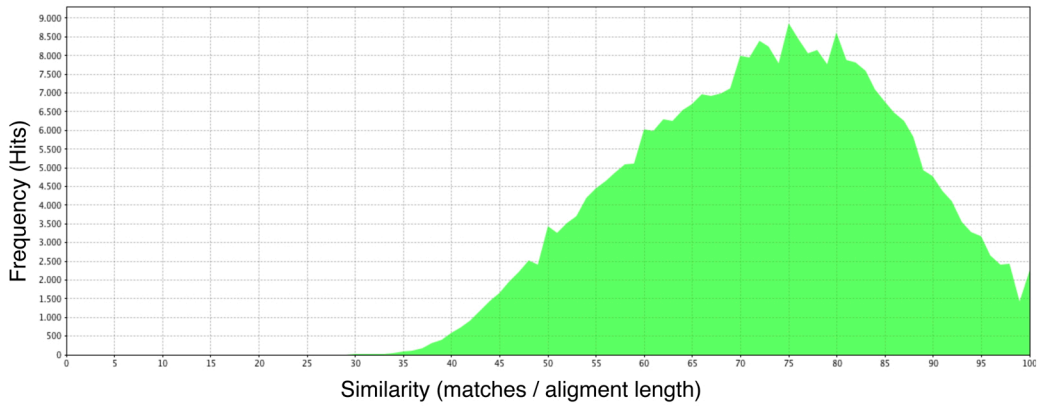

B

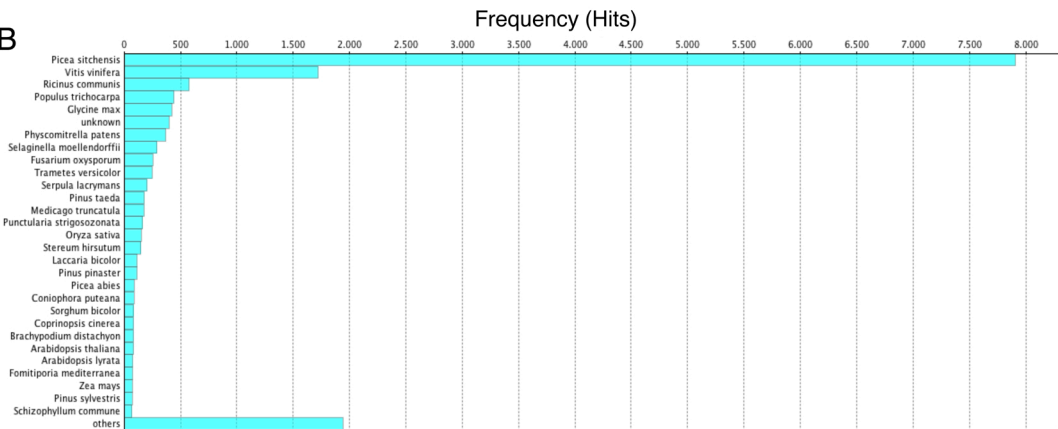

C

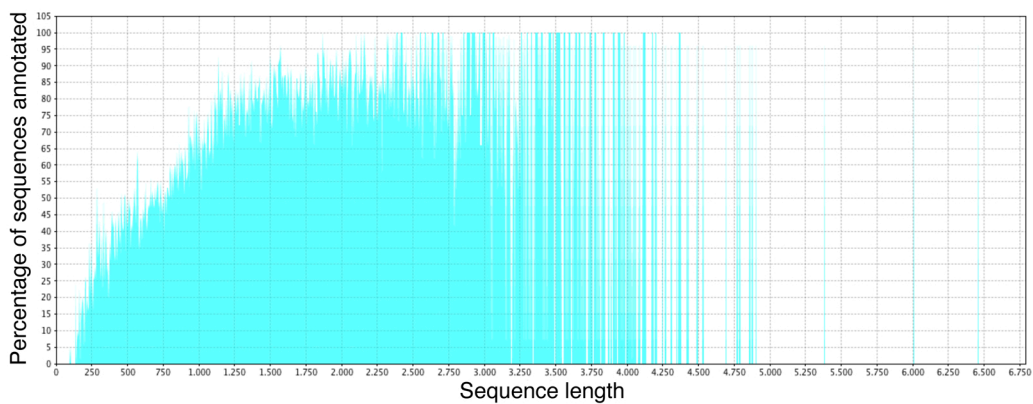

D

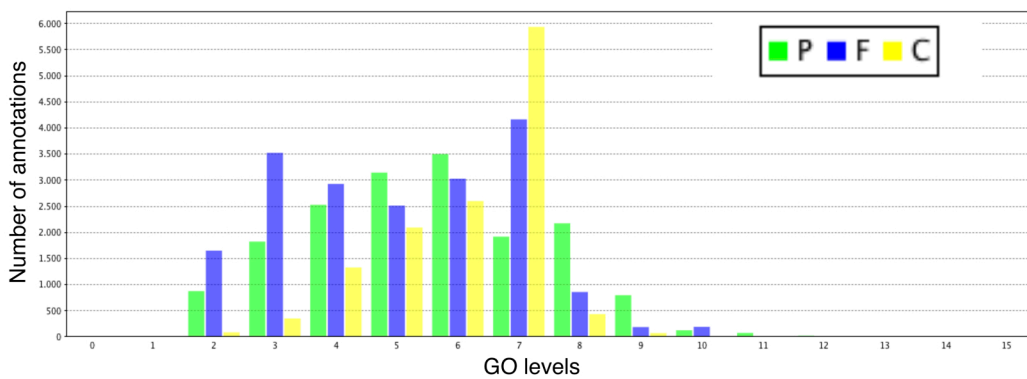

Supplement: 1471-2229-13-123-S4.pdf [file 1471-2229-13-123-S4.pdf]
